# Supplementary material for: Systematic Review and Meta-Analysis of Seasonal Malaria Chemoprevention
Source: PubMed Central journal article supplement (PMC10793029; doi:10.4269/ajtmh.23-0481), 2023-12-11
Supplement: tpmd230481.SD1.pdf [file tpmd230481.SD1.pdf]

**Search Query:** Systematic review on seasonal malaria chemoprevention/chemoprophylaxis AND seasonal intermittent preventive treatment of malaria in children. Exclude pregnant/pregnancy.

**Search References:**

Meremikwu MM, Donegan S, Sinclair D, Esu E, Oringanje C. Intermittent preventive treatment for malaria in children living in areas with seasonal transmission. *Cochrane Database Syst Rev.* 2012 Feb 15;2012(2):CD003756.

**Search Strategy:**

| Database                          | Strategy                                                                                                                                                                                                                                                                        | Run Date | Records                                                     |
|-----------------------------------|---------------------------------------------------------------------------------------------------------------------------------------------------------------------------------------------------------------------------------------------------------------------------------|----------|-------------------------------------------------------------|
| <b>Medline (OVID) 1946-</b>       | Malaria* OR antimalaria* OR anti-malaria*<br>AND<br>Chemoprevention OR chemoprophylaxis OR Chemo-prevention OR chemo-prophylaxis OR intermittent preventive<br>AND<br>Child* OR school* OR preschool* OR infant* OR newborn* OR neonat*<br>Limit 2000 – ;                       | 3/2/2021 | 285                                                         |
| <b>Embase (OVID) 1988-</b>        | Malaria* OR antimalaria* OR anti-malaria*<br>AND<br>Chemoprevention OR chemoprophylaxis OR Chemo-prevention OR chemo-prophylaxis OR intermittent preventive<br>AND<br>Child* OR school* OR preschool* OR infant* OR newborn* OR neonat*<br>Not pubmed/medline<br>Limit 2000 – ; | 3/2/2021 | 327<br>-179<br>duplicates<br><br>=148<br>unique<br>items    |
| <b>PsycINFO (OVID) 1806-</b>      | Malaria* OR antimalaria* OR anti-malaria*<br>AND<br>Chemoprevention OR chemoprophylaxis OR Chemo-prevention OR chemo-prophylaxis OR intermittent preventive<br>AND<br>Child* OR school* OR preschool* OR infant* OR newborn* OR neonat*<br>Limit 2000 – ;                       | 3/2/2021 | 2<br><br>-1<br>duplicates<br><br>=1<br>unique<br>items      |
| <b>Global Health (OVID) 1910-</b> | Malaria* OR antimalaria* OR anti-malaria*<br>AND<br>Chemoprevention OR chemoprophylaxis OR Chemo-prevention OR chemo-prophylaxis OR intermittent preventive<br>AND<br>Child* OR school* OR preschool* OR infant* OR newborn* OR neonat*<br>Limit 2000 – ;                       | 3/2/2021 | 268<br><br>-191<br>duplicates<br><br>=77<br>unique<br>items |
| <b>Cochrane Library</b>           | Malaria* OR antimalaria* OR anti-malaria*<br>AND                                                                                                                                                                                                                                | 3/2/2021 | 60<br><br>-51                                               |

## Supplemental File 2: Excluded studies

| Study              | Title                                                                                                                                                                                                                                                                                                                             | Reason for exclusion        |
|--------------------|-----------------------------------------------------------------------------------------------------------------------------------------------------------------------------------------------------------------------------------------------------------------------------------------------------------------------------------|-----------------------------|
| Abiola 2015        | Impact of seasonal malaria chemoprevention in the production of msp1 the ama1 antibodies in Senegal                                                                                                                                                                                                                               | no outcomes                 |
| Ahorlu 2009        | Effectiveness of intermittent preventive treatment for children (IPTC) combined with timely treatment at home for malaria control                                                                                                                                                                                                 | intervention: year round    |
| Ahorlu 2009        | Effectiveness of combined intermittent preventive treatment for children and timely home treatment for malaria control                                                                                                                                                                                                            | intervention: year round    |
| Ahorlu 2011        | Two-year evaluation of Intermittent Preventive Treatment for Children (IPTc) combined with timely home treatment for malaria control in Ghana                                                                                                                                                                                     | duplicate                   |
| Aikins 2017        | COST-EFFECTIVENESS OF SEASONAL MALARIA CHEMOPREVENTION IN UPPER WEST REGION OF GHANA                                                                                                                                                                                                                                              | no outcomes                 |
| Alexander 2007     | Modelling the impact of intermittent preventive treatment for malaria on selection pressure for drug resistance                                                                                                                                                                                                                   | modeling                    |
| Angoran-Benie 2019 | Community-based approach to reach malnourished infants from 6 months to 5 years during a seasonal malaria chemoprevention (SMC) campaign in remote areas in Niger                                                                                                                                                                 | intervention: SMC+nutrition |
| Anne 2018          | Strategy for improving the treatment of seasonal malaria chemoprevention among children from 3 to 120 months of age in Goudomp health district, Senegal: A 3-day directly observed treatment initiative                                                                                                                           | no outcomes                 |
| Anne 2019          | Seasonal malaria chimio prevention 2017 in the health district of Goudomp Senegal cost-effectiveness analysis of two treatment strategies for children aged 3-120 months                                                                                                                                                          | no outcomes                 |
| Anonymous 2016     | Corrigendum: Impact of combined intermittent preventive treatment of malaria and helminths on anaemia, sustained attention, and recall in Northern Ghanaian schoolchildren                                                                                                                                                        | correction                  |
| Anonymous 2016     | Correction: safety of Seasonal Malaria Chemoprevention (SMC) with sulfadoxine-pyrimethamine plus amodiaquine when delivered to children under 10 years of age by district health services in Senegal: results from a stepped-wedge cluster randomized trial (PLoS ONE (2016) 11: 10 (e0162563) DOI: 10.1371/journal.pone.0162563) | link to included            |
| Ansah 2016         | Evaluation of the impact of seasonal malaria chemoprevention on mortality and mortality in young children in Northern Ghana                                                                                                                                                                                                       | design: one cluster per arm |
| Ansah 2016         | Evaluation of the impact of implementation of seasonal malaria chemoprevention on morbidity and mortality in young children: A qualitative study in Northern Ghana                                                                                                                                                                | no outcomes                 |
| Antwi 2016         | Facilitators and Barriers to Uptake of an Extended Seasonal Malaria Chemoprevention Programme in Ghana: A Qualitative Study of Caregivers and Community Health Workers                                                                                                                                                            | no outcomes                 |
| Attaher 2016       | Influence of seasonal malaria chemoprevention on markers of T cell exhaustion and immunoregulation                                                                                                                                                                                                                                | no outcomes                 |
| Attaher 2020       | Effect of Seasonal Malaria Chemoprevention on Immune Markers of Exhaustion and Regulation                                                                                                                                                                                                                                         | no outcomes                 |
| Ba 2014            | Extending the age range for seasonal malaria chemoprevention (SMC): Effectiveness of SMC in children under 10 years of age delivered through the district health service in Senegal                                                                                                                                               | link to included            |
| Ba 2018            | Implementation, coverage and equity of large-scale door-to-door delivery of Seasonal Malaria Chemoprevention (SMC) to children under 10 in Senegal                                                                                                                                                                                | no outcomes                 |

|                |                                                                                                                                                               |                                      |
|----------------|---------------------------------------------------------------------------------------------------------------------------------------------------------------|--------------------------------------|
| Barger 2009    | Intermittent preventive treatment using artemisinin-based combination therapy reduces malaria morbidity among school-aged children in Mali                    | intervention: < 3 cycles             |
| Barry 2016     | Comparison of three versus four rounds of seasonal malaria chemoprevention on the incidence of clinical malaria in Mali                                       | no control - compares 3 vs 4 cycles  |
| Barry 2018     | Optimal mode for delivery of seasonal malaria chemoprevention in Ouelessebougou, Mali: A cluster randomized trial                                             | no outcomes                          |
| Beeson 2011    | Intermittent preventive treatment to reduce the burden of malaria in children: new evidence on integration and delivery                                       | no primary data                      |
| Beshir 2016    | Baseline frequencies of molecular markers of drug resistance before scaling-up access to seasonal malaria chemoprevention in seven countries across the Sahel | no outcomes                          |
| Beshir 2017    | Baseline molecular data before scaling-up of seasonal malaria chemoprevention in seven countries across the Sahel                                             | no outcomes                          |
| Bicaba 2020    | Longitudinal analysis of the capacities of community health workers mobilized for seasonal malaria chemoprevention in Burkina Faso                            | no outcomes                          |
| Bigira 2012    | Assessing the association between malaria chemoprevention and the nutritional status of a cohort of young African children                                    | not seasonal                         |
| Bigira 2014    | Protective efficacy and safety of three antimalarial regimens for the prevention of malaria in young Ugandan children: a randomized controlled trial          | not seasonal                         |
| Bisanzio 2019  | The effectiveness of seasonal malaria chemoprevention (SMC) in the operational programming context of Guinea                                                  | no outcomes                          |
| Bojang 2008    | A randomised trial to compare the safety, tolerability and efficacy of three drug combinations for intermittent preventive treatment in children              | duplicate                            |
| Bojang 2009    | A Study of intermittent preventive treatment and home based management of malaria in a rural area of The Gambia                                               | link to included                     |
| Bojang 2010    | A randomised trial to compare the safety, tolerability and efficacy of three drug combinations for intermittent preventive treatment in children              | no control - compares drug regimens  |
| Bojang 2011    | Two strategies for the delivery of IPTc in an area of seasonal malaria transmission in the Gambia: a randomised controlled trial                              | no control - compares delivery modes |
| Bonkougou 2018 | Seasonal malaria chemoprevention, an effective intervention for reducing malaria morbidity and mortality                                                      | no control                           |
| Bonkougou 2019 | Using seasonal malaria chemoprevention (SMC) to screen for acute malnutrition                                                                                 | no outcomes                          |
| Boulanger 2010 | Immunological consequences of intermittent preventive treatment against malaria in Senegalese preschool children                                              | no outcomes                          |
| Brune 2017     | Seasonal malaria chemoprevention in Ankililoaka, Madagascar                                                                                                   | no control                           |
| Cairns 2010    | Amodiaquine dosage and tolerability for intermittent preventive treatment to prevent malaria in children                                                      | no outcomes                          |

|                    |                                                                                                                                                                                                                                               |                                     |
|--------------------|-----------------------------------------------------------------------------------------------------------------------------------------------------------------------------------------------------------------------------------------------|-------------------------------------|
| Cairns 2012        | Estimating the potential public health impact of seasonal malaria chemoprevention in African children                                                                                                                                         | modeling                            |
| Cairns 2015        | Analysis of Preventive Interventions for Malaria: Exploring Partial and Complete Protection and Total and Primary Intervention Effects                                                                                                        | no control - SMC vs IPTi            |
| Cairns 2015        | Randomised controlled trial: Monthly malaria chemoprevention shows potential in an area of very high, perennial malaria transmission                                                                                                          | no primary data                     |
| Cairns 2016        | Optimizing seasonal malaria chemoprevention (SMC) in Africa: Estimating the impact of increasing the number of SMC cycles on the number of children protected, the malaria burden and cost-effectiveness                                      | modeling                            |
| Cairns 2017        | Monitoring the protective efficacy of seasonal malaria chemoprevention using case-control studies: Methodology and results from 5 countries                                                                                                   | case control                        |
| Cairns 2019        | Effectiveness of seasonal malaria chemoprevention in areas of intense, seasonal malaria transmission: Secondary analysis of data from a household-randomized clinical trial in Burkina Faso and Mali                                          | intervention:<br>SMC+AZ             |
| Cairns 2019        | The duration of protection from azithromycin against malaria, pneumonia and gastroenteritis when given alongside seasonal malaria chemoprevention: Secondary analysis of data from a clinical trial in Houde, Burkina Faso and Bougouni, Mali | intervention:<br>SMC+AZ             |
| Cairns 2020        | Evaluation of seasonal malaria chemoprevention in two areas of intense seasonal malaria transmission: Secondary analysis of a household-randomised, placebo-controlled trial in Houde District, Burkina Faso and Bougouni District, Mali      | intervention:<br>SMC+AZ             |
| CairnsMatthew 2015 | Monthly malaria chemoprevention shows potential in an area of very high, perennial malaria transmission                                                                                                                                       | duplicate                           |
| Camara 2018        | Perception of the mothers and the child minders of the region of Sedhiou on the seasonal malaria chemoprevention in 2017: Are the absences and the diseases of the children - No cases of disguised refusals?                                 | no outcomes                         |
| Ceesay 2016        | Implementation of seasonal malaria chemoprevention in the Gambia                                                                                                                                                                              | no outcomes                         |
| Ceesay 2017        | IMPLEMENTATION OF SEASONAL MALARIA CHEMOPREVENTION IN THE GAMBIA                                                                                                                                                                              | no outcomes                         |
| Chandramohan 2019  | Effect of Adding Azithromycin to Seasonal Malaria Chemoprevention                                                                                                                                                                             | intervention:<br>SMC+AZ             |
| Chatio 2019        | Community acceptability of Seasonal Malaria Chemoprevention of morbidity and mortality in young children: A qualitative study in the Upper West Region of Ghana                                                                               | no outcomes                         |
| Cisse 2009         | Randomized trial of piperazine with sulfadoxine-pyrimethamine or dihydroartemisinin for malaria intermittent preventive treatment in children                                                                                                 | no control - compares drug regimens |
| Clarke 2008        | Effect of intermittent preventive treatment of malaria on health and education in schoolchildren: a cluster-randomised, double-blind, placebo-controlled trial                                                                                | not seasonal                        |
| Clarke 2014        | Seasonal malaria chemoprevention and micronutrient supplementation in early childhood: Effect on asymptomatic parasitaemia, anemia and cognition                                                                                              | intervention:<br>SMC+nutrition      |
| Clarke 2015        | Seasonal malaria chemoprevention combined with micronutrient supplementation delivered through community preschools: Findings from a cluster randomized trial in Mali                                                                         | intervention:<br>SMC+nutrition      |
| Clarke 2016        | Impact of micronutrient supplementation combined with malaria chemoprevention on malaria, anaemia and                                                                                                                                         | intervention:                       |

|               |                                                                                                                                                                                                                                   |                                         |
|---------------|-----------------------------------------------------------------------------------------------------------------------------------------------------------------------------------------------------------------------------------|-----------------------------------------|
|               | cognitive development in early childhood: Findings from a cluster randomized study in southern Mali                                                                                                                               | SMC+nutrition                           |
| Clarke 2017   | Impact of a malaria intervention package in schools on Plasmodium infection, anaemia and cognitive function in schoolchildren in Mali: a pragmatic cluster-randomised trial                                                       | intervention: < 3 cycles                |
| Clarke 2017   | IMPACT OF MICRONUTRIENT SUPPLEMENTATION COMBINED WITH MALARIA CHEMOPREVENTION ON MALARIA, ANAEMIA AND COGNITIVE DEVELOPMENT IN EARLY CHILDHOOD: FINDINGS FROM A CLUSTER RANDOMIZED STUDY IN SOUTHERN MALI                         | intervention: SMC+nutrition             |
| Coldiron 2016 | Safety and tolerability of dihydroartemisinin-piperazine as intermittent preventive treatment for malaria in a refugee camp, adjumani, Uganda                                                                                     | not seasonal                            |
| Coldiron 2017 | PROTECTIVE EFFECTIVENESS OF SEASONAL MALARIA CHEMOPREVENTION IN NIGER: A PROSPECTIVE CASECONTROL STUDY                                                                                                                            | case control                            |
| Coldiron 2017 | Prevalence of parasitemia in an area receiving SMC                                                                                                                                                                                | no control                              |
| Coldiron 2017 | Prevalence of parasitemia during two seasons in an area receiving seasonal malaria chemoprevention (SMC) in Niger                                                                                                                 | no control                              |
| Coldiron 2017 | Intermittent preventive treatment for malaria among children in a refugee camp in Northern Uganda: lessons learned                                                                                                                | not seasonal                            |
| Coldiron 2019 | Clinical diagnostic evaluation of HRP2 and pLDH-based rapid diagnostic tests for malaria in an area receiving seasonal malaria chemoprevention in Niger                                                                           | no control - comparison of RDTs         |
| Compaore 2011 | Efficacy of dihydroartemisinin plus piperazine compared to amodiaquine plus sulfadoxine/pyrimethamine in seasonal IPT of malaria in children in a rural area of Bobo-Dioulasso (Burkina Faso)                                     | link to included                        |
| Compaore 2017 | Association of malaria and anemia with malnutrition in children following a seasonal malaria chemoprevention program in a rural area of Burkina Faso                                                                              | no control                              |
| Compaore 2017 | Evaluation of the implementation fidelity of the seasonal malaria chemoprevention intervention in Kaya health district, Burkina Faso                                                                                              | no outcomes                             |
| Conteh 2010   | Cost effectiveness of seasonal intermittent preventive treatment using amodiaquine & artesunate or sulphadoxine-pyrimethamine in Ghanaian children                                                                                | no outcomes                             |
| Danquah 2012  | Reduced efficacy of intermittent preventive treatment of malaria in malnourished children (Antimicrobial Agents and Chemotherapy (2009) 53, 5 (1753-1759))                                                                        | intervention: IPTi                      |
| Diallo 2014   | Pharmacovigilance during campaign of seasonal malaria chemoprevention in Senegal, 2013                                                                                                                                            | no outcomes                             |
| Diallo 2016   | Active monitoring of pharmacovigilance at community level during the seasonal malaria chemoprevention campaign in the health district Kolda Senegal, 2015                                                                         | no control - compares pharmacovigilance |
| Diallo 2017   | Monitoring seasonal malaria chemoprevention campaigns: lessons learned from coverage surveys in 7 countries                                                                                                                       | no outcomes                             |
| Diallo 2018   | Monitoring of pharmacovigilance during the seasonal malaria chemoprevention campaign in Senegal, 2013 to 2017                                                                                                                     | no outcomes                             |
| Diarra 2015   | Qualitative Research to Inform the Implementation of Home Fortification with Nutrition Education with Seasonal Malaria Chemoprevention through Early Childhood Development Centres for Children Aged 6-59 Months in Sikasso, Mali | no outcomes                             |

|              |                                                                                                                                                                                                                           |                                |
|--------------|---------------------------------------------------------------------------------------------------------------------------------------------------------------------------------------------------------------------------|--------------------------------|
| Diarra 2017  | Impact of micronutrient powders combined with malaria chemoprevention on anemia, malaria and cognitive development: A cluster-randomized study in Malian children                                                         | intervention:<br>SMC+nutrition |
| Diarra 2018  | Impact of seasonal malaria chemoprevention on malaria transmission on two sites of therapeutic efficacy study in Mali                                                                                                     | no control                     |
| Diarra 2019  | Molecular studies of PfdHPS and PfdHFR during seasonal malaria chemoprevention at three study sites in Mali                                                                                                               | no outcomes                    |
| Diawara 2015 | Measuring the impact of seasonal malaria chemoprevention as part of routine malaria control in Kita Mali                                                                                                                  | no control                     |
| Diawara 2017 | Measuring the impact of seasonal malaria chemoprevention as part of routine malaria control in Kita, Mali                                                                                                                 | design: one cluster<br>per arm |
| Diawara 2017 | FAILURE OF AVAILABLE MALARIA CONTROL INTERVENTIONS IN DANGASSA, MALI: CONTINUOUSLY HIGH PREVALENCE OF PLASMODIUM FALCIPARUM INFECTION IN A COHORT OF 1,400 INDIVIDUALS FROM 2012 TO 2015                                  | no control                     |
| Diawara 2019 | Impact of seasonal malaria chemoprevention among children five to ten years of age in Kita and Bafoulabe districts, Mali                                                                                                  | abstract only                  |
| Dicko 2008   | Impact of intermittent preventive treatment with sulphadoxine-pyrimethamine targeting the transmission season on the incidence of clinical malaria in children in Mali                                                    | intervention: < 3<br>cycles    |
| Dicko 2011   | Malaria morbidity in children in the year after they had received intermittent preventive treatment of malaria in Mali: a randomized control trial                                                                        | link to included               |
| Dicko 2016   | A trial of seasonal malaria chemoprevention plus azithromycin in African children                                                                                                                                         | protocol                       |
| Dieng 2019   | Contrasting Asymptomatic and Drug Resistance Gene Prevalence of Plasmodium falciparum in Ghana: Implications on Seasonal Malaria Chemoprevention                                                                          | no outcomes                    |
| Ding 2020    | Adherence and Population Pharmacokinetic Properties of Amodiaquine When Used for Seasonal Malaria Chemoprevention in African Children                                                                                     | no outcomes                    |
| Diouf 2015   | Seasonal malaria chemoprevention implementation in children from three to 120 months experience in the four southern regions in Senegal                                                                                   | no outcomes                    |
| Druetz 2017  | Seasonal malaria chemoprevention in Burkina Faso protects children against malaria and anaemia under routine program implementation                                                                                       | inappropriate control          |
| Druetz 2018  | Impact Evaluation of Seasonal Malaria Chemoprevention under Routine Program Implementation: A Quasi-Experimental Study in Burkina Faso                                                                                    | inappropriate control          |
| Druetz 2018  | Evaluation of direct and indirect effects of seasonal malaria chemoprevention in Mali                                                                                                                                     | no control                     |
| Esch 2018    | Estimating the health impact of a seasonal malaria chemoprevention intervention in Mali in 2017: Modeling deaths averted, cases averted and disability adjusted life years (DALYS) averted                                | modeling                       |
| Esch 2019    | Prospectively estimating the health impact of upcoming president's malaria initiative impact malaria project-supported seasonal malaria chemoprevention campaigns in 70 districts across Niger, Mali and Cameroon in 2019 | modeling                       |
| Fabrice 2010 | Prevalence and selection of Plasmodium falciparum drug resistance molecular markers under intermittent preventive therapy in Burkina Faso                                                                                 | no outcomes                    |
| Fabrice 2011 | Plasmodium falciparum drug resistance molecular markers under intermittent preventive therapy with                                                                                                                        | no outcomes                    |

|                  |                                                                                                                                                                                       |                    |
|------------------|---------------------------------------------------------------------------------------------------------------------------------------------------------------------------------------|--------------------|
|                  | dihydroartemisinin-piperaquine (DP) vs. amodiaquine-sulfadoxine/pyrimethamine (AQ-SP) in Burkina Faso                                                                                 |                    |
| Geerligts 2003   | Analysis of the effects of malaria chemoprophylaxis in children on haematological responses, morbidity and mortality                                                                  | review             |
| Grais 2018       | Molecular markers of resistance to amodiaquine plus sulfadoxine-pyrimethamine in an area with seasonal malaria chemoprevention in south central Niger                                 | no outcomes        |
| Gueye 2018       | Decrease of malaria burden among children under five years and other age groups in SMC regions in Senegal                                                                             | no control         |
| Guillebaud 2013  | Epidemiology of malaria in an area of seasonal transmission in Niger and implications for the design of a seasonal malaria chemoprevention strategy                                   | no outcomes        |
| Hulle 2016       | Implementing seasonal malaria chemoprevention (SMC) in the context of Ebola virus disease (EVD) in Guinea                                                                             | no control         |
| Humphreys 2018   | Spatiotemporal modelling of prevalence of plasmodium falciparum drug resistance mutations in the DHPS gene across Africa, 1990 - 2015                                                 | modeling           |
| Issiaka 2015     | Determining the optimal mode for delivery of seasonal malaria chemoprevention in Mali                                                                                                 | no outcomes        |
| Issiaka 2017     | Impact of seasonal malaria chemoprevention on hospital admissions and mortality in children under 5 years in Ouelessebougou, Mali                                                     | link to included   |
| Jagannathan 2016 | Effective Antimalarial Chemoprevention in Childhood Enhances the Quality of CD4+ T Cells and Limits Their Production of Immunoregulatory Interleukin 10                               | no outcomes        |
| Jean 2012        | Seasonal malaria chemoprevention and community case management for malaria in southern Senegal: A cluster-randomized trial                                                            | no outcomes        |
| Kaly 2018        | Knowledge, attitudes and practices of mothers caretakers of children aged 3 to 120 months on of seasonal malaria chemo prevention in Bounkiling health district, South Senegal        | no outcomes        |
| Kamate 2017      | Scaling up seasonal malaria chemoprevention in Mali: Implementation challenges and lessons learned                                                                                    | no control         |
| Kanya 2020       | The Impact of Control Interventions on Malaria Burden in Young Children in a Historically High-Transmission District of Uganda: A Pooled Analysis of Cohort Studies from 2007 to 2018 | not seasonal       |
| Kana 2017        | Scaling-up of seasonal malaria chemoprevention in Sokoto and Zamfara states, Nigeria: Monitoring delivery and impact                                                                  | no outcomes        |
| Katile 2019      | Malaria parasitemia incidence among different age groups in a stable transmission area of Mali receiving seasonal malaria chemoprevention                                             | no control         |
| Kobbe 2011       | Follow-up survey of children who received sulfadoxine-pyrimethamine for intermittent preventive antimalarial treatment in infants                                                     | intervention: IPTi |
| Kombate 2019     | Analysis of the quality of seasonal malaria chemoprevention provided by community health Workers in Boulsa health district, Burkina Faso                                              | no outcomes        |
| Konate 2011      | Morbidity from malaria in children in the year after they had received intermittent preventive treatment of malaria: a randomised trial                                               | link to included   |
| Konate 2019      | Effect of seasonal malaria chemoprevention on malaria in children under 5 years: A cohort study in Dangassa, Mali                                                                     | no control         |
| Konate 2020      | Effect of routine seasonal malaria chemoprevention on malaria trends in children under 5 years in Dangassa,                                                                           | no control         |

|                       |                                                                                                                                                                                                                                                             |                             |
|-----------------------|-------------------------------------------------------------------------------------------------------------------------------------------------------------------------------------------------------------------------------------------------------------|-----------------------------|
|                       | Mali                                                                                                                                                                                                                                                        |                             |
| Koscalova 2015        | Monitoring the protective effect and the effectiveness of seasonal malaria chemoprevention in Niger                                                                                                                                                         | inappropriate control       |
| Koscalova 2017        | Malaria incidence in the area of seasonal malaria chemoprevention                                                                                                                                                                                           | case control                |
| Kpormegbe 2014        | The role of community participation in intermittent preventive treatment of childhood malaria in southeastern Ghana                                                                                                                                         | no outcomes                 |
| Kweku 2009            | Options for the delivery of intermittent preventive treatment for malaria to children: a community randomised trial                                                                                                                                         | no outcomes                 |
| Kweku 2011            | Assessment of the efficacy, tolerability and ease of administration of dihydroartemisinin plus piperaquine and artesunate plus sulfamethoxypyrazine plus pyrimethamine compared with sulphadoxine-pyrimethamine for preventing malaria in Ghanaian children | no control                  |
| Lasry 2015            | Seasonal malaria chemoprevention, three years of implementation                                                                                                                                                                                             | no control                  |
| LeMenach 2015         | Combining nutritional supplementation with seasonal malaria chemoprevention in Nigeria decreases the odds of confirmed clinical malaria: Findings from a case-control study                                                                                 | intervention: SMC+nutrition |
| Lo 2011               | Impact of seasonal intermittent preventive treatment in children: Molecular markers of resistance in three health districts in Senegal                                                                                                                      | no outcomes                 |
| Lo 2012               | Prevalence of mutation of pfcr1 after the use of amodiaquine in intermittent preventive treatment in children (IPTC) in Senegal                                                                                                                             | no outcomes                 |
| Lo 2013               | Prevalence of molecular markers of drug resistance in an area of seasonal malaria chemoprevention in children in Senegal                                                                                                                                    | no outcomes                 |
| Mahamar 2016          | Seasonal malaria chemoprevention is associated with a reduction in seropositivity to blood-stage antigens                                                                                                                                                   | no outcomes                 |
| Mahamar 2017          | Effect of seasonal malaria chemoprevention on the acquisition of antibodies to Plasmodium falciparum antigens in Ouelessebouyou, Mali                                                                                                                       | no outcomes                 |
| Mahamar 2019          | Long-term effect of seasonal malaria chemoprevention with amodiaquine plus sulfadoxine-pyrimethamine on molecular markers of resistance in Ouelessebouyou, Mali                                                                                             | no outcomes                 |
| Mahamar 2019          | Effect of four years of seasonal malaria chemoprevention on the acquisition of antibodies to plasmodium falciparum antigens in Ouelessebouyou, Mali                                                                                                         | no outcomes                 |
| Maiga 2014            | School performance after intermittent preventive treatment using artemisinin-based combination                                                                                                                                                              | intervention: < 3 cycles    |
| Maiga 2016            | Seasonal Malaria Chemoprevention with Sulphadoxine-Pyrimethamine and Amodiaquine Selects Pfdhfr-dhps Quintuple Mutant Genotype in Mali                                                                                                                      | no outcomes                 |
| Maiga 2018            | Selection of seven-mutation Pfcrt-Pfmdr1 genotype after scaling seasonal malaria chemoprevention with sulphadoxine-pyrimethamine and amodiaquine in Mali                                                                                                    | no outcomes                 |
| Maiteki 2015          | School-based treatment with act to reduce transmission' (start-IPT): Evaluation of the community impact of intermittent preventive treatment for malaria in Ugandan children                                                                                | not seasonal                |
| Maiteki-Sebuguzi 2017 | EVALUATING THE COMMUNITY-LEVEL IMPACT OF INTERMITTENT PREVENTIVE TREATMENT OF SCHOOLCHILDREN FOR MALARIA IN JINJA, UGANDA: A CLUSTER-RANDOMIZED TRIAL                                                                                                       | not seasonal                |



|                                              |                                                                                                                                                                                                          |              |
|----------------------------------------------|----------------------------------------------------------------------------------------------------------------------------------------------------------------------------------------------------------|--------------|
| Matangila 2015                               | Efficacy and safety of intermittent preventive treatment with sulfadoxine-pyrimethamine (SP) and SP-piperazine in schoolchildren in Kinshasa, The Democratic Republic of the Congo (RDC)                 | not seasonal |
| Matangila 2015                               | Efficacy and safety of intermittent preventive treatment for malaria in schoolchildren: a systematic review                                                                                              | review       |
| Matangila 2017                               | The perception of parents and teachers about intermittent preventive treatment for malaria in school children in a semi-rural area of Kinshasa, in the Democratic Republic of Congo                      | not seasonal |
| Matangila 2017                               | Efficacy and safety of intermittent preventive treatment in schoolchildren with sulfadoxine/pyrimethamine (SP) and SP plus piperazine in Democratic Republic of the Congo: a randomised controlled trial | not seasonal |
| Meremikwu 2005                               | Chemoprophylaxis and intermittent treatment for preventing malaria in children                                                                                                                           | review       |
| Meremikwu 2008                               | Chemoprophylaxis and intermittent treatment for preventing malaria in children                                                                                                                           | review       |
| Meremikwu 2012                               | Intermittent preventive treatment for malaria in children living in areas with seasonal transmission                                                                                                     | review       |
| Moroso 2017                                  | Transforming the malaria landscape: Results from a three year implementation research project expanding access to seasonal malaria chemoprevention in seven Sahelian countries (ACCESS-SMC)              | case control |
| Muhindo 2017                                 | Intermittent preventive treatment with dihydroartemisinin-piperazine in young Ugandan children in the setting of indoor residual spraying of insecticide                                                 | not seasonal |
| Namirimu 2013                                | Impact of chemoprevention on the development of t cell responses to malaria                                                                                                                              | not seasonal |
| Nankabirwa 2010                              | Efficacy, safety, and tolerability of three regimens for prevention of malaria: a randomized, placebo-controlled trial in Ugandan schoolchildren                                                         | not seasonal |
| Nankabirwa 2014                              | Impact of intermittent preventive treatment with dihydroartemisinin-piperazine on malaria in Ugandan schoolchildren: a randomized, placebo-controlled trial                                              | not seasonal |
| National Institute for Medical Research 2020 | Evaluation of the Implementation and Effectiveness of Intermittent Preventive Treatment for Malaria Using Dihydroartemisinin-piperazine on Reducing Malaria Burden in School Aged Children in Tanzania   | not seasonal |
| Nayiga 2015                                  | Lessons for integrating intermittent preventive treatment for malaria in school systems in low income settings: Experiences from Uganda                                                                  | not seasonal |
| Nct 2005                                     | Study of the Impact of Intermittent Preventive Treatment in Schools on Malaria, Anaemia and Education                                                                                                    | protocol     |
| Nct 2014                                     | A Trial of Seasonal Malaria Chemoprevention Plus Azithromycin in African Children                                                                                                                        | protocol     |
| Nct 2017                                     | Seasonal Malaria Chemoprevention With or Without Lipid-based Nutrient Supplement in Children Aged 6-59 Months in Mali                                                                                    | protocol     |
| Nct 2019                                     | Seasonal Malaria Chemoprevention With Dihydroartemisin Piperazine vs. Sulfadoxine-pyrimethamine+Amodiaquine                                                                                              | protocol     |
| Ndiaye 2011                                  | Costing a large-scale implementation of intermittent preventive treatment of malaria in children delivered through community health workers in Senegal                                                   | no outcomes  |

|             |                                                                                                                                                                                                                                                 |                  |
|-------------|-------------------------------------------------------------------------------------------------------------------------------------------------------------------------------------------------------------------------------------------------|------------------|
| Ndiaye 2011 | Impact of intermittent preventive treatment in children (IPTC) on Plasmodium falciparum infections complexity: Resistance markers and kinetic of antibodies against P. falciparum in Senegal                                                    | no outcomes      |
| Ndiaye 2011 | Monitoring of drug resistance after intermittent preventive treatment for infants and children (IPTI/C) in Senegal                                                                                                                              | no outcomes      |
| Ndiaye 2011 | Safety of seasonal intermittent preventive treatment against malaria with sulfadoxine pyrimethamine + amodiaquine when delivered to children under ten years of age by district health staff in Senegal                                         | no outcomes      |
| Ndiaye 2012 | Costing a large-scale implementation of seasonal malaria chemoprevention in children delivered through community health workers in Senegal                                                                                                      | no outcomes      |
| Ndiaye 2013 | Evaluation of the tolerance of sulfadoxine-pyrimethamine + amodiaquine combination in seasonal malaria chemoprevention (SMC) combined with home based management (HMM) in children under 10 years in Senegal                                    | link to included |
| Ndiaye 2013 | Selection of antimalarial drug resistance after intermittent preventive treatment of infants and children (IPTi/c) in Senegal                                                                                                                   | no outcomes      |
| Ndiaye 2013 | Seasonal malaria chemoprevention in Senegal: From research to policy                                                                                                                                                                            | no outcomes      |
| Ndiaye 2014 | Potential impact of intermittent preventive treatment (IPT) on the acquisition of antibodies to malaria antigens GLURP-R0 and AMA-1 in Senegalese children                                                                                      | no outcomes      |
| Ndiaye 2015 | Evaluation of the impact of seasonal malaria chemoprevention administered by mass campaign in Southern Senegal                                                                                                                                  | case control     |
| Ndiaye 2015 | Potential Impact of Seasonal Malaria Chemoprevention on the Acquisition of Antibodies Against Glutamate-Rich Protein and Apical Membrane Antigen 1 in Children Living in Southern Senegal                                                       | no outcomes      |
| Ndiaye 2016 | Impact evaluation after three years of seasonal malaria chemoprevention implementation by mass campaigns in southern Senegal                                                                                                                    | case control     |
| Ndiaye 2016 | Safety of Seasonal Malaria Chemoprevention (SMC) with Sulfadoxine-Pyrimethamine plus Amodiaquine when Delivered to Children under 10 Years of Age by District Health Services in Senegal: Results from a Stepped-Wedge Cluster Randomized Trial | link to included |
| Ndiaye 2016 | Trends of high reduction of malaria cases in Sedhiou district following seasonal malaria chemoprevention first campaign: Lessons learned                                                                                                        | no control       |
| Ndiaye 2016 | IMMUNOLOGICAL EFFECT OF SEASONAL MALARIA CHEMOPREVENTION (SMC) WITH SULFADOXINEPYRIMETHAMINE (SP) AND AMODIAQUINE (AQ) IN CHILDREN UNDER 10 YEARS IN THE SOUTHEASTERN PART OF SENEGAL                                                           | no outcomes      |
| Ndiaye 2017 | IMPACT EVALUATION AFTER THREE YEARS OF SEASONAL MALARIA CHEMOPREVENTION IMPLEMENTATION BY MASS CAMPAIGNS IN SOUTHERN SENEGAL                                                                                                                    | case control     |
| Ndiaye 2017 | TRENDS OF HIGH REDUCTION OF MALARIA CASES IN SEDHIOU DISTRICT FOLLOWING SEASONAL MALARIA CHEMOPREVENTION FIRST CAMPAIGN: LESSONS LEARNED                                                                                                        | no control       |
| Ndiaye 2017 | Impact of seasonal malaria chemoprevention after 3 years at scale in Southern Senegal                                                                                                                                                           | no control       |
| Ndiaye 2018 | Evaluation of Two Strategies for Community-Based Safety Monitoring during Seasonal Malaria Chemoprevention Campaigns in Senegal, Compared with the National Spontaneous Reporting System                                                        | no outcomes      |
| Ndiop 2015  | Tracking the impact of seasonal malaria chemoprevention on morbidity and mortality of children in Senegal                                                                                                                                       | no control       |

|                  |                                                                                                                                                                                                          |                   |
|------------------|----------------------------------------------------------------------------------------------------------------------------------------------------------------------------------------------------------|-------------------|
|                  | through the routine health information system                                                                                                                                                            |                   |
| Ndiop 2017       | Has seasonal malaria chemoprevention decreased the malaria burden among children under five years in Senegal?                                                                                            | no control        |
| Nonvignon 2016   | Cost-effectiveness of seasonal malaria chemoprevention in upper west region of Ghana                                                                                                                     | no outcomes       |
| Noor 2015        | Sub-National Targeting of Seasonal Malaria Chemoprevention in the Sahelian Countries of the Nouakchott Initiative                                                                                        | modeling          |
| Ntab 2007        | Impact of intermittent preventive anti-malarial treatment on the growth and nutritional status of preschool children in rural Senegal (west Africa)                                                      | no outcomes       |
| Obiero 2019      | The effect of adding azithromycin to the antimalarials (sulphadoxine/pyrimethamine and amodiaquine) used for seasonal malaria chemoprevention on the immune response to plasmodium falciparum            | no outcomes       |
| Okuneye 2019     | Using models to inform implementation policies of seasonal malaria chemoprevention                                                                                                                       | modeling          |
| Oresanya 2019    | An assessment of quality of delivery of seasonal malaria chemoprevention using low literate community health workers in Nigeria                                                                          | no outcomes       |
| Ouedraogo 2016   | Impact of seasonal malaria chemoprophylaxis in a high and seasonal malaria transmission setting in Burkina Faso                                                                                          | modeling          |
| Ouedraogo 2016   | Effective scaling-up of seasonal malaria chemoprevention in Burkina Faso                                                                                                                                 | no outcomes       |
| Ouedraogo 2017   | Understanding and optimizing operational seasonal malaria chemoprevention through data analysis and modeling: The example of Burkina Faso                                                                | modeling          |
| Ouedraogo 2017   | EFFECTIVE SCALING-UP OF SEASONAL MALARIA CHEMOPREVENTION IN BURKINA FASO                                                                                                                                 | no outcomes       |
| Pactr 2013       | An integrated malaria control strategy including community case management and Seasonal Malaria Chemoprevention in Senegal                                                                               | protocol          |
| Pactr 2014       | Randomized open-label trial to evaluate the efficacy of artesunate-amodiaquine for seasonal malaria chemoprevention in suburban school of Bamako, Sirak                                                  | protocol          |
| Patouillard 2011 | Coverage, adherence and costs of intermittent preventive treatment of malaria in children employing different delivery strategies in Jasikan, Ghana                                                      | no outcomes       |
| Pitt 2012        | Intermittent preventive treatment of malaria in children: a qualitative study of community perceptions and recommendations in Burkina Faso and Mali                                                      | no outcomes       |
| Pitt 2015        | Delivering seasonal malaria chemoprevention to children under ten at scale in central Senegal: Costs and cost determinants                                                                               | no outcomes       |
| Pitt 2017        | Large-scale delivery of seasonal malaria chemoprevention to children under 10 in Senegal: an economic analysis                                                                                           | no outcomes       |
| Rehman 2019      | Intermittent preventive treatment of malaria delivered to primary schoolchildren provided effective individual protection in Jinja, Uganda: secondary outcomes of a cluster-randomized trial (START-IPT) | not seasonal      |
| Roger 2011       | Impact of combining intermittent preventive treatment with home management of malaria in children under ten                                                                                              | intervention: < 3 |

|               |                                                                                                                                                                                                                           |                                       |
|---------------|---------------------------------------------------------------------------------------------------------------------------------------------------------------------------------------------------------------------------|---------------------------------------|
|               | years, in a rural area of Senegal                                                                                                                                                                                         | cycles                                |
| Rohner 2010   | In a randomized controlled trial of iron fortification, anthelmintic treatment, and intermittent preventive treatment of malaria for anemia control in Ivorian children, only anthelmintic treatment shows modest benefit | intervention: < 3 cycles              |
| Sagara 2016   | Coverage of seasonal malaria chemoprevention delivered by mobile teams at fixed points in 14 districts in Mali, through Access-SMC                                                                                        | no outcomes                           |
| Sagara 2017   | A TRIAL OF SEASONAL MALARIA CHEMOPREVENTION PLUS AZITHROMYCIN IN AFRICAN CHILDREN                                                                                                                                         | intervention: SMC+AZ                  |
| Sagara 2017   | Seasonal malaria chemoprevention scaling up and its impact assessment in Mali                                                                                                                                             | no control                            |
| Sagara 2017   | COVERAGE OF SEASONAL MALARIA CHEMOPREVENTION DELIVERED BY MOBILE TEAMS AT FIXED POINTS IN 14 DISTRICTS IN MALI, THROUGH ACCESS-SMC                                                                                        | no outcomes                           |
| Sagara 2018   | Seasonal malaria chemoprevention scaling up in Mali: Coverage and impact on malaria burden and markers of the resistance of plasmodium falciparum to sulfadoxine pyrimethamine and amodiaquine                            | no control                            |
| Salam 2014    | Impact of community-based interventions for the prevention and control of malaria on intervention coverage and health outcomes for the prevention and control of malaria                                                  | review                                |
| Salissou 2016 | Perception de la chimioprevention du paludisme saisonnier au Niger                                                                                                                                                        | duplicate                             |
| Salissou 2016 | Perception of the seasonal malaria chemoprevention in Niger                                                                                                                                                               | no outcomes                           |
| Sangare 2019  | Seasonal malaria chemoprevention and compliance during four monthly treatments with sulfadoxine-pyrimethamine and amodiaquine at 3 study sites in Mali                                                                    | no outcomes                           |
| Saye 2015     | Malaria chemoprevention, undernutrition and anaemia in children: Findings from three randomized intervention trials in Southern Mali                                                                                      | intervention: SMC+nutrition           |
| Shehu 2017    | Malaria preventive practices and acceptability of seasonal malaria chemoprevention among caregivers of under five children in rural and urban communities of Kano, Nigeria, 2017                                          | no outcomes                           |
| Sokhna 2008   | A trial of the efficacy, safety and impact on drug resistance of four drug regimens for seasonal intermittent preventive treatment for malaria in Senegalese children                                                     | no control - comparison of 4 regimens |
| Some 2014     | Selection of drug resistance-mediating Plasmodium falciparum genetic polymorphisms by seasonal malaria chemoprevention in Burkina Faso                                                                                    | no outcomes                           |
| Soumare 2017  | SEASONAL MALARIA CHEMOPREVENTION IS ASSOCIATED WITH A REDUCTION IN SEROPOSITIVITY TO BLOOD-STAGE ANTIGENS                                                                                                                 | no outcomes                           |
| Staedke 2018  | Assessment of community-level effects of intermittent preventive treatment for malaria in schoolchildren in Jinja, Uganda (START-IPT trial): a cluster-randomised trial                                                   | not seasonal                          |
| Strachan 2016 | The use of formative research to inform the design of a seasonal malaria chemoprevention intervention in northern Nigeria                                                                                                 | no outcomes                           |
| Sundell 2015  | Variable piperazine exposure significantly impacts protective efficacy of monthly dihydroartemisinin-piperazine for the prevention of malaria in Ugandan children                                                         | not seasonal                          |
| Sylla 2016    | Immunological effect of seasonal malaria chemoprevention (SMC) with sulfadoxine-pyrimethamine (SP) and                                                                                                                    | no outcomes                           |

|                |                                                                                                                                                                                                          |                                |
|----------------|----------------------------------------------------------------------------------------------------------------------------------------------------------------------------------------------------------|--------------------------------|
|                | amodiaquine (AQ) in children under 10 years in the southeastern part of Senegal                                                                                                                          |                                |
| Tagbor 2015    | The protective efficacy of seasonal malaria chemoprevention in an area of extended seasonal transmission in the Ashanti region of Ghana: An individually randomized trial                                | link to included               |
| Tarning 2018   | Pharmacokinetic and pharmacodynamic properties of dihydroartemisinin-piperaquine in seasonal malaria chemoprevention in young children                                                                   | no outcomes                    |
| Temperley 2008 | Costs and cost-effectiveness of delivering intermittent preventive treatment for malaria through schools in western Kenya                                                                                | not seasonal                   |
| Temperley 2008 | Costs and cost-effectiveness of delivering intermittent preventive treatment through schools in western Kenya                                                                                            | not seasonal                   |
| Thomas 2017    | Malaria prevention with nutrient supplementation in addition to seasonal chemoprevention in children aged 6-59 months in rural Mali                                                                      | intervention:<br>SMC+nutrition |
| Tine 2011      | Impact of combining intermittent preventive treatment with home management of malaria in children under 10 years, in a rural area of Senegal                                                             | intervention: < 3<br>cycles    |
| Tine 2011      | Impact of combining intermittent preventive treatment with home management of malaria in children less than 10 years in a rural area of Senegal: a cluster randomized trial                              | intervention: < 3<br>cycles    |
| Tine 2013      | Feasibility, safety and effectiveness of combining home based malaria management (HMM) and seasonal malaria chemoprevention (SMC) in children less than ten years in Senegal: A cluster-randomized trial | link to included               |
| Tine 2013      | Acceptability by community health workers in Senegal of combining community case management of malaria and seasonal malaria chemoprevention                                                              | no outcomes                    |
| Tine 2014      | Combining community case management of malarial and seasonal malaria chemoprevention for children less than 10 years in Senegal: Feasibility, impact on malaria and Anemia                               | link to included               |
| Toure 2016     | Failure of available malaria control interventions in Dangassa, Mali: Continuously high prevalence of plasmodium falciparum infection in a cohort of 1,400 individuals from 2012 to 2015                 | no control                     |
| Toure 2017     | Age-specific changes in the incidence of uncomplicated plasmodium falciparum malaria: Seasonal malaria chemoprevention (SMC) in an area with intense transmission: Dangassa, Mali                        | abstract only                  |
| VanHulle 2017  | IMPLEMENTING SEASONAL MALARIA CHEMOPREVENTION (SMC) IN THE CONTEXT OF EBOLA VIRUS DISEASE (EVD) IN GUINEA                                                                                                | no control                     |
| Wagman 2017    | Observational evidence of a complimentary effect of combining next generation indoor residual spraying and seasonal malaria chemoprevention in the Segou region of Mali, 2014                            | link to included               |
| Ward 2014      | Comparison of seasonal malaria chemoprevention coverage in northern Nigeria via door-to-door, health facility and retail sector delivery                                                                 | no outcomes                    |
| Ward 2015      | Impact of integrating the delivery of seasonal malaria chemoprevention with nutrition supplementation in northern Nigeria on health outcomes: A pragmatic intervention trial                             | intervention:<br>SMC+nutrition |
| Ward 2019      | Seasonal malaria chemoprevention packaged with malnutrition prevention in northern Nigeria: A pragmatic trial (SMAMP study) with nested case-control                                                     | intervention:<br>SMC+nutrition |
| Wilson 2011    | A systematic review and meta-analysis of the efficacy and safety of intermittent preventive treatment of malaria                                                                                         | review                         |

|                 |                                                                                                                                                                                             |                 |
|-----------------|---------------------------------------------------------------------------------------------------------------------------------------------------------------------------------------------|-----------------|
|                 | in children (IPTc)                                                                                                                                                                          |                 |
| Yerbanga 2016   | Assessment of malaria transmission from human to mosquitoes in seasonal malaria chemoprevention in the western region of Burkina Faso                                                       | no outcomes     |
| York 2017       | Seasonal malaria chemoprevention in the Sahel                                                                                                                                               | no primary data |
| Zongo 2016      | Dihydroartemisin-piperaquine for seasonal malaria chemoprevention                                                                                                                           | no control      |
| Zongo 2017      | DIHYDROARTEMISIN-PIPERAQUINE FOR SEASONAL MALARIA CHEMOPREVENTION                                                                                                                           | no control      |
| Zongo 2019      | Optimizing delivery of seasonal malaria chemoprevention (SMC) for children under five years of age: Very high coverage consistently achieved through door-to-door campaigns in Burkina Faso | no outcomes     |
| Zuilkowski 2014 | Early childhood malaria prevention and children's patterns of school leaving in the Gambia                                                                                                  | no outcomes     |

AZ: azithromycin; IPTi: intermittent preventive treatment in infancy; SMC: seasonal malaria chemoprevention; RDT: rapid diagnostic test

|                                                                  |                                                                                                                                                                                                                                                                                                                                |          |                                                        |
|------------------------------------------------------------------|--------------------------------------------------------------------------------------------------------------------------------------------------------------------------------------------------------------------------------------------------------------------------------------------------------------------------------|----------|--------------------------------------------------------|
|                                                                  | <p>Chemoprevention OR chemoprophylaxis OR Chemo-prevention OR chemo-prophylaxis OR “intermittent preventive”</p> <p>AND</p> <p>Child* OR school* OR preschool* OR infant* OR newborn* OR neonat*</p> <p>Limit 2000 – ;</p>                                                                                                     |          | <p>duplicates</p> <p>=9 unique items</p>               |
| <b>CINAHL (EBSCOHost)</b>                                        | <p>Malaria* OR antimalaria* OR anti-malaria*</p> <p>AND</p> <p>Chemoprevention OR chemoprophylaxis OR Chemo-prevention OR chemo-prophylaxis OR “intermittent preventive”</p> <p>AND</p> <p>Child* OR school* OR preschool* OR infant* OR newborn* OR neonat*</p> <p>Limit 2000 – ; Exclude Medline records</p>                 | 3/2/2021 | <p>3</p> <p>-2 duplicates</p> <p>=1 unique items</p>   |
| <b>Africa-Wide Information (EBSCOHost)</b>                       | <p>Malaria* OR antimalaria* OR anti-malaria*</p> <p>AND</p> <p>Chemoprevention OR chemoprophylaxis OR Chemo-prevention OR chemo-prophylaxis OR “intermittent preventive”</p> <p>AND</p> <p>Child* OR school* OR preschool* OR infant* OR newborn* OR neonat*</p> <p>Limit 2000 – ;</p>                                         | 3/2/2021 | <p>57</p> <p>-55 duplicates</p> <p>=2 unique items</p> |
| <b>Scopus</b>                                                    | <p>TITLE-ABS-KEY(Malaria* OR antimalaria* OR anti-malaria*) AND TITLE-ABS-KEY(Chemoprevention OR chemoprophylaxis OR Chemo-prevention OR chemo-prophylaxis OR “intermittent preventive”) AND TITLE-ABS-KEY(Child* OR school* OR preschool* OR infant* OR newborn* OR neonat*) AND NOT INDEX(medline)</p> <p>Limit 2000 – ;</p> | 3/2/2021 | <p>47</p> <p>-41 duplicates</p> <p>=6 unique items</p> |
| <b>Global Index Medicus (WHO)</b><br><br><b>-includes LILACS</b> | <p>Malaria* OR antimalaria* OR anti-malaria*</p> <p>AND</p> <p>Chemoprevention OR chemoprophylaxis OR Chemo-prevention OR chemo-prophylaxis OR “intermittent preventive”</p> <p>AND</p> <p>Child* OR school* OR preschool* OR infant* OR newborn* OR neonat*</p> <p>Limit 2000 – ;</p>                                         | 3/2/2021 | <p>24</p> <p>-5 duplicates</p> <p>=19 unique items</p> |
| <b>Clinicaltrials.gov</b>                                        | <p>intermittent preventive treatment OR intermittent preventive therapy   malaria   Child (birth – 17)</p>                                                                                                                                                                                                                     | 3/2/2021 | <p>62</p> <p>-0 duplicates</p> <p>=62 unique items</p> |

Notes: Duplicates were identified using the Endnote automated "find duplicates" function with preference set to match on title, author and year, and removed from your Endnote library. There will likely be additional duplicates found that Endnote was unable to detect.



## Supplemental File 1: Non-randomized study designs

Types of studies included:

- Controlled before-and-after studies (CBAs) with: (a) a contemporaneous control group, and (b) at least two sites per arm.
- Interrupted time series (ITS) studies with: (a) a clearly defined point in time when the intervention occurred, and (b) at least two (if a contemporaneous control group is available) or three (if no control group is available) data points collected both before the first round of SMC and after the last round of SMC, measured at evenly spaced intervals (i.e., monthly). Baseline up to one year prior to intervention is required.

Description of the search strategy and data abstraction methods are detailed in the main text.

Of the five non-randomized designs included, one was an individual non-randomized controlled trial, which compared SP+AQ and dihydroartemisinin-piperazine (DP) in a randomized fashion, but did not include a randomized control group (Zongo 2015, Burkina Faso). Four were cluster non-randomized controlled: one used artemether-lumefantrine (AL) in three cycles among school children with anti-parasitics (albendazole+praziquantel) in both arms (Opoku 2016, Ghana), two compared four cycles of SP+AQ vs nothing among children <5 years of age (Issiaka 2020 in Mali and Salissou 2017 in Niger), and one compared indoor residual spraying (IRS)+SMC vs IRS vs SMC vs nothing in Mali, in which SMC was given as four cycles of SP+AQ to children < 5 years (Wagman 2020). For Zongo 2015, we presented the DP vs control and SP+AQ vs control separately, and for Wagman 2020, we presented SMC+IRS vs IRS and SMC vs nothing separately.

Table SF1.1: Outcomes presented by each study – non-randomized designs

| Study         | Country      | Design                            | Age group   | # of cycles | Comparison                             | Outcomes                                                                  |
|---------------|--------------|-----------------------------------|-------------|-------------|----------------------------------------|---------------------------------------------------------------------------|
| Issiaka 2020  | Mali         | cluster non-randomized controlled | 3-59 months | 4           | SP+AQ vs nothing                       | hospitalization, severe malaria, mortality                                |
| Opoku 2016    | Ghana        | cluster non-randomized controlled | 6-15 years  | 3           | AL+anti-parasitic vs anti-parasitic    | prevalence, anemia                                                        |
| Salissou 2017 | Niger        | cluster non-randomized controlled | 3-59 months | 4           | SP+AQ vs nothing                       | incidence, severe malaria, hospitalization, mortality, prevalence, anemia |
| Wagman 2020   | Mali         | cluster non-randomized controlled | 3-59 months | 4           | SP+AQ + IRS vs IRS vs SP+AQ vs nothing | incidence                                                                 |
| Zongo 2015    | Burkina Faso | individual non-randomized control | 3-59 months | 3           | SP+AQ vs control, DP vs control        | incidence, mortality, prevalence, anemia                                  |

SP: sulfadoxine-pyrimethamine; AQ: amodiaquine; IRS: indoor residual spraying; DP: dihydroartemisinin-piperazine

Table SF1.2. Characteristics of included non-randomized studies

| Study         | Country      | Design                                  | Age group  | Comparison                                             | # of cycles | Number enrolled                                              | SMC coverage                   | Parasite prevalence | ITN use |
|---------------|--------------|-----------------------------------------|------------|--------------------------------------------------------|-------------|--------------------------------------------------------------|--------------------------------|---------------------|---------|
| Issiaka 2020  | Mali         | Cross sectional survey                  | 3-59 mo    | SP+AQ vs nothing monthly                               | 4           | Survey: SMC 2759 control 3879                                | Not reported                   | 50%                 | >80%    |
| Opoku 2016    | Ghana        | Cluster controlled (2 clusters per arm) | 6-15 years | AL+alb+praz vs alb+praz                                | 3           | AL+alb+praz: 90 alb+praz:127                                 | Not reported                   | Not reported        | 40%     |
| Salissou 2017 | Niger        | Cross sectional survey, 48 villages     | 3-59 mo    | SP+AQ monthly vs nothing                               | 4           | Survey: 241 SMC 241 control                                  | Not reported                   | 56%                 | >80%    |
| Wagman 2020   | Mali         | Cluster controlled                      | 3-59 mo    | SP+AQ monthly + IRS vs IRS vs SP+AQ monthly vs nothing | 4           | Pop: IRS+SMC: 334,000 IRS: 236,000 SMC 394,000 control 1.42M | >90% (administrative coverage) | 50%                 | >80%    |
| Zongo 2015    | Burkina Faso | Individual controlled                   | 3-59 mo    | SP+AQ vs control, DP vs control, monthly               | 3           | DP: 757 SP+AQ: 742 Control: 250                              | >95% per cycle                 | 40-60%              | >80%    |

SP: sulfadoxine-pyrimethamine; AQ: amodiaquine; IRS: indoor residual spraying; DP: dihydroartemisinin-piperazine; alb: albendazole; praz: praziquantel

|               | Domain 1a | Domain 2 | Domain 3: Incidence | Domain 3: Severe malaria | Domain 3: Hospitalization | Domain 3: Mortality | Domain 3: Prevalence | Domain 3: Anemia | Domain 4: Incidence | Domain 4: Severe Malaria | Domain 4: Hospitalization | Domain 4: Mortality | Domain 4: Prevalence | Domain 4: Anemia | Domain 5 | Overall: Incidence | Overall: Severe Malaria | Overall: Hospitalization | Overall: Mortality | Overall: Prevalence | Overall: Anemia |
|---------------|-----------|----------|---------------------|--------------------------|---------------------------|---------------------|----------------------|------------------|---------------------|--------------------------|---------------------------|---------------------|----------------------|------------------|----------|--------------------|-------------------------|--------------------------|--------------------|---------------------|-----------------|
| Issiaka 2020  | ?         | ?        |                     | -                        | -                         | -                   |                      |                  |                     | -                        | -                         | -                   |                      |                  | ?        |                    | -                       | -                        | -                  |                     |                 |
| Opoku 2016    | ?         | +        |                     |                          |                           |                     | +                    | +                |                     |                          |                           |                     | -                    | -                | +        |                    |                         |                          |                    | -                   | -               |
| Salissou 2017 | -         | ?        | -                   | -                        | -                         | -                   | ?                    | ?                | -                   | -                        | -                         | -                   | -                    | -                | ?        | -                  | -                       | -                        | -                  | -                   | -               |
| Wagman 2020   | ?         | ?        | ?                   |                          |                           |                     |                      |                  | +                   |                          |                           |                     |                      |                  | ?        | ?                  |                         |                          |                    |                     |                 |
| Zongo 2015    | ?         | +        | +                   |                          |                           | +                   | +                    | +                | ?                   |                          |                           | ?                   | +                    | +                | +        | ?                  |                         |                          | ?                  | ?                   | ?               |

**Non-randomized studies:** Domain 1a. Failure to develop and apply appropriate eligibility criteria (inclusion of control population); Domain 1b. Not applicable; Domain 2. Flawed measurement of exposure; Domain 3. Incomplete follow-up; Domain 4. Flawed measurement of outcome (outcome-level); Domain 5. Failure to adequately control for confounding

Figure SF1.1. Risk of bias summary: review authors' judgements about each risk-of-bias item for each included study by malaria outcomes, non-randomized studies

#### Incidence in non-randomized studies

Three studies with non-randomized controls, two of which had multiple controls, reported effect on incidence, all among children < 5 years of age receiving three to four cycles. Zongo 2015 compared SP+AQ to DP in a randomized fashion, but the control group was not randomized. SP+AQ and DP had an effect that was comparable within the trial, and with randomized studies among children < 5 years receiving three to four cycles.

Table SF1.3. Incidence among children < 5 years in non-randomized studies

| Study IDs     | Country      | Comparator         | Age group | # of cycles | N                               | Risk ratio                   |
|---------------|--------------|--------------------|-----------|-------------|---------------------------------|------------------------------|
| Salissou 2017 | Niger        | SP+AQ vs nothing   | 3-59 mo   | 4           | 241 SMC, 241 control            | PR: 0.25 (0.20-0.31)         |
| Wagman 2020A  | Mali         | SP+AQ + IRS vs IRS | 3-59 mo   | 4           | IRS+SMC: 334,000; IRS: 236,000, | RR: 0.96 (95% CI 0.51-1.37)  |
| Wagman 2020B  | Mali         | SP+AQ vs nothing   | 3-59 mo   | 4           | SMC 394,000; control 1.42M      | RR: 0.84 (95% CI 0.45-1.55)  |
| Zongo 2015A   | Burkina Faso | SP+AQ vs nothing   | 3-59 mo   | 3           | 742 SP+AQ, 250 control          | RR : 0.20 (95% CI 0.14-0.28) |
| Zongo 2015B   | Burkina Faso | DP vs nothing      | 3-59 mo   | 3           | 757 DP, 250 control             | RR: 0.26 (95% CI 0.19-0.35)  |

SP: sulfadoxine-pyrimethamine; AQ: amodiaquine; IRS: indoor residual spraying; DP: dihydroartemisinin-piperazine; SMC: seasonal malaria chemoprevention

*Prevalence among children < 5 years of age in non-randomized designs*

Three studies reported prevalence among children < 5 years of age, one that compared SP+AQ to DP (Zongo 2015), one that compared AL + anti-parasitics vs anti-parasitics (Opoku 2016), and one that compared SP+AQ to nothing (Salissou 2017).

Table SF1.4. Prevalence among children < 5 years of age in non-randomized studies

| Study ID      | Country      | Comparator              | Age group  | # of cycles | N                               | Prevalence ratio            |
|---------------|--------------|-------------------------|------------|-------------|---------------------------------|-----------------------------|
| Opoku 2016    | Ghana        | AL alb+praz vs alb+praz | 6-15 years | 3           | AL+alb+praz: 90<br>alb+praz:127 | PR: 0.46 (95% CI 0.21-0.98) |
| Salissou 2017 | Niger        | SP+AQ vs nothing        | 3-59 mo    | 4           | 241 SMC,<br>241 control         | PR: 0.76 (95% CI 0.57-1.02) |
| Zongo 2015A   | Burkina Faso | SP+AQ vs nothing        | 3-59 mo    | 3           | 742 SP+AQ,<br>250 control       | PR: 0.42 (95% CI 0.31-0.55) |
| Zongo 2015B   | Burkina Faso | DP vs nothing           | 3-59 mo    | 3           | 757 DP,<br>250 control          | PR: 0.49 (95% CI 0.37-0.65) |

SP: sulfadoxine-pyrimethamine; AQ: amodiaquine ; AL: artemether-lumefantrine; alb: albendazole; praz: praziquantel; DP: dihydroartemisinin-piperazine; SMC: seasonal malaria chemoprevention

*Prevalence of any anemia among children < 5 years of age in non-randomized studies*

Two studies reported any anemia: Opoku 2016 compared AL + albendazole + praziquantel to albendazole + praziquantel in school children 6–15 years of age and Salissou 2017 compared SP+AQ to nothing among children < 5 years.

Table SF1.5. Prevalence of any anemia among children < 5 years, non-randomized studies

| Study IDs     | Country | Comparator              | Age group  | # of cycles | N                               | Prevalence ratio            |
|---------------|---------|-------------------------|------------|-------------|---------------------------------|-----------------------------|
| Opoku 2016    | Ghana   | AL+alb+praz vs alb+praz | 6-15 years | 3           | AL+alb+praz: 90<br>alb+praz:127 | PR: 1.24 (95% CI 0.62-2.50) |
| Salissou 2017 | Niger   | SP+AQ vs nothing        | 3-59 mo    | 4           | 241 SMC,<br>241 control         | PR: 1.0 (95% CI 0.25-3.95)  |

SP: sulfadoxine-pyrimethamine; AQ: amodiaquine; AL: artemether-lumefantrine; alb: albendazole; praz: praziquantel; SMC: seasonal malaria chemoprevention

*Prevalence of moderate anemia among children < 5 years of age in non-randomized studies*

Zongo 2015 reported moderate anemia among children < 5 years of age who received either three cycles of SP+AQ or DP to nothing. There was not an effect of SMC, either with SP+AQ or DP, in either arm.

Table SF1.6. Prevalence of moderate anemia among children < 5 years in non-randomized studies

| Study IDs   | Country      | Comparator       | Age group | # of cycles | N                      | Prevalence ratio               |
|-------------|--------------|------------------|-----------|-------------|------------------------|--------------------------------|
| Zongo 2015A | Burkina Faso | SP+AQ vs nothing | 3-59 mo   | 3           | 742 SP+AQ, 250 control | PR = 1.14 (95% CI = 0.80-1.61) |
| Zongo 2015B | Burkina Faso | DP vs nothing    | 3-59 mo   | 3           | 757 DP, 250 control    | PR = 1.04 (95% CI 0.73-1.48)   |

SP: sulfadoxine-pyrimethamine; AQ: amodiaquine; DP: dihydroartemisinin-piperazine

#### *Incidence of severe malaria in non-randomized studies*

Two studies reported incidence of severe malaria among children < 5 years of age receiving three to four cycles of SP+AQ (Issiaka 2020, Salissou), both based on reports by guardians of children during cross sectional surveys. Results from both studies were comparable to those found in randomized studies.

Table SF1.7. Incidence of severe malaria among children < 5 years, non-randomized studies

| Study ID      | Country | Comparator       | Age group | # of cycles | N                      | Risk ratio                  |
|---------------|---------|------------------|-----------|-------------|------------------------|-----------------------------|
| Issiaka 2020  | Mali    | SP+AQ vs nothing | 3-59 mo   | 4           | 2759 SMC, 3879 control | RR: 0.51 (95% CI 0.34–0.76) |
| Salissou 2017 | Niger   | SP+AQ vs nothing | 3-59 mo   | 4           | 241 SMC, 241 control   | RR: 0.28 (95% CI 0.19-0.42) |

SP: sulfadoxine-pyrimethamine; AQ: amodiaquine; SMC: seasonal malaria chemoprevention

#### *Incidence of hospitalization for any cause in non-randomized studies*

Two studies reported incidence of severe malaria among children < 5 years of age receiving three to four cycles of SP+AQ (Issiaka 2020, Salissou), both based on reports by guardians of children during cross sectional surveys. While Issiaka 2020 reports results comparable to results from randomized studies, Salissou 2017 reports an effect larger than that of randomized studies.

Table SF1.8. Incidence of all-cause hospitalization among children < 5 years of age, non-randomized studies

| Study IDs     | Country | Drug             | Age group | # of cycles | N                      | Risk ratio                  |
|---------------|---------|------------------|-----------|-------------|------------------------|-----------------------------|
| Issiaka 2020  | Mali    | SP+AQ vs nothing | 3-59 mo   | 4           | 2759 SMC, 3879 control | RR: 0.58 (95% CI 0.41-0.81) |
| Salissou 2017 | Niger   | SP+AQ vs nothing | 3-59 mo   | 4           | 241 SMC, 241 control   | PR: 0.17 (95% CI 0.09-0.31) |

SP: sulfadoxine-pyrimethamine; AQ: amodiaquine; SMC: seasonal malaria chemoprevention

*All-cause mortality among children < 5 years of age in non-randomized studies*

Three studies reported all-cause mortality among children < 5 years of age receiving 3-4 cycles of SMC in non-randomized designs, one that reported SP+AQ and DP (Zongo 2015), and two that reported SP+AQ (Issiaka 2020, Salissou 2017). With the exception of the DP arm in Zongo 2015, the effect size was greater than that reported for randomized designs.

Table SF1.9. Incidence of all-cause mortality among children < 5 years of age, non-randomized studies

| Study IDs     | Country      | Comparator       | Age group | # of cycles | N                      | Risk ratio                  |
|---------------|--------------|------------------|-----------|-------------|------------------------|-----------------------------|
| Zongo 2015A   | Burkina Faso | SP+AQ vs nothing | 3-59 mo   | 3           | 742 SP+AQ, 250 control | RR: 0.67 (95% CI 0.06-7.43) |
| Zongo 2015B   | Burkina Faso | DP vs nothing    | 3-59 mo   | 3           | 757 DP, 250 control    | RR: 1.32 (95% CI 0.5-11.82) |
| Issiaka 2020  | Mali         | SP+AQ vs nothing | 3-59 mo   | 4           | 2759 SMC, 3879 control | RR 0.44 (95% CI 0.22–0.91)  |
| Salissou 2017 | Niger        | SP+AQ vs nothing | 3-59 mo   | 4           | 241 SMC, 241 control   | RR: 0.54 (95% CI 0.22-1.33) |

SP: sulfadoxine-pyrimethamine; AQ: amodiaquine; SMC: seasonal malaria chemoprevention; DP: dihydroartemisinin-piperaquine
